# Supplementary material for: SLC35F2, a Transporter Sporadically Mutated in the Untranslated Region, Promotes Growth, Migration, and Invasion of Bladder Cancer Cells
Source: Cells. 2021 Jan 6;10(1):80. doi: 10.3390/cells10010080 (PMC7825079; doi:10.3390/cells10010080)
Supplement: Supplementary file 1 [file cells-10-00080-s001.zip › Supplementary-tables-and-figures_Rev2_proofread.pdf]

## Supplementary Data

Table S1

Table S2

Table S3

Figure S1

Figure S2

Figure S3

**Table S1.** Sequences of primers for Expression analyses of target genes by RT-qPCR

| Target gene           | Primer  | Sequence (5' – 3')     |
|-----------------------|---------|------------------------|
| <b><i>RPS13</i></b>   | forward | CGAAAGCATCTTGAGAGGAACA |
|                       | reverse | TCGAGCCAAACGGTGAATC    |
| <b><i>RPS23</i></b>   | forward | TGGAGGTGCTTCTCATGCAA   |
|                       | reverse | AATGGCAGAATTTGGCTGTTTG |
| <b><i>SLC35F2</i></b> | forward | TGGCATTTCGATCAGGCAGT   |
|                       | reverse | TCTGCTAGTCCCAGCAGGAT   |
| <b><i>NLucP</i></b>   | forward | GGGAGGTGTGTCCAGTTTGT   |
|                       | reverse | CTTCAGCCCATTTTCACCGC   |
| <b><i>Luc2</i></b>    | forward | CGCCATTCTACCCACTCGAA   |
|                       | reverse | TGTCCACCTCGATATGTGCG   |

**Table S2.** Mutagenesis primers for UTR of SLC35F2

| Insert                                | Primer  | Sequence (5' – 3')       |
|---------------------------------------|---------|--------------------------|
| <b>3'UTR-SLC35F2<br/>mutation C/T</b> | forward | AGGGGCAGCTTACGGTGGCTC    |
|                                       | reverse | GTTCTTGACCACCAAGCCC      |
| <b>3'UTR-SLC35F2<br/>mutation C/G</b> | forward | ATAGCAGACTGAGAATGGACACTC |
|                                       | reverse | TTCCCCAAGTGTCCCCTC       |

**Table S1.** Comparison of known frequent mutations in bladder cancer with our study

| Gen      | Exome seq.                    | RNA seq.                                          | Exome sequencing                                       |       |      |
|----------|-------------------------------|---------------------------------------------------|--------------------------------------------------------|-------|------|
|          | TCGA<br>Cell 2017<br>412 MIBC | Hedegaard et al.<br>Cancer Cell 2018<br>460 NMIBC | non-silent mutations in CDS in this study<br>all cases | NMIBC | MIBC |
|          |                               |                                                   | n=20                                                   | n=8   | n=11 |
| TP53     | <b>48</b>                     | 8                                                 | 45                                                     | 25    | 54.5 |
| KMT2D    | <b>28</b>                     | <5                                                | 30                                                     | 37.5  | 27.3 |
| KDM6A    | <b>26</b>                     | 22                                                | 30                                                     | 37.5  | 27.3 |
| ARID1A   | <b>25</b>                     | 13                                                | 20                                                     | 12.5  | 27.3 |
| PIK3CA   | <b>22</b>                     | 23                                                | 20                                                     | 12.5  | 27.3 |
| KMT2C    | <b>18</b>                     | <5                                                | 10                                                     | 0     | 18.2 |
| RB1      | <b>18</b>                     | 7                                                 | 5                                                      | 12.5  | 0    |
| EP300    | <b>15</b>                     | 15                                                | 10                                                     | 12.5  | 12.5 |
| FAT4     | <b>15</b>                     | <5                                                | 10                                                     | 12.5  | 12.5 |
| FGFR3    | 15                            | <b>53</b>                                         | 5                                                      | 12.5  | 0    |
| KIAA1109 | 8                             | <b>37</b>                                         | 10                                                     | 12.5  | 9.1  |
| SYNE2    | 14                            | <b>31</b>                                         | 10                                                     | 12.5  | 9.1  |
| AHNAK    | 12                            | <b>27</b>                                         | 5                                                      | 12.5  | 0    |
| DST      | 9                             | <b>26</b>                                         | 5                                                      | 0     | 9.1  |
| RNF213   | 5                             | <b>25</b>                                         | 0                                                      | 0     | 0    |
| BIRC6    | 11                            | <b>25</b>                                         | 10                                                     | 12.5  | 9.1  |
| DYNC1H1  | 6                             | <b>25</b>                                         | 0                                                      | 0     | 0    |
| AKAP9    | 8                             | <b>25</b>                                         | 5                                                      | 12.5  | 0    |

**Bold:** Most frequent mutated genes in MIBC ( $\geq 15\%$ ) in the TCGA Study (Comprehensive Molecular Characterization of Muscle-Invasive Bladder Cancer. Cell. 2017 Oct 19;171(3):540-556.e25. doi: 10.1016/j.cell.2017.09.007) and in NMIBC ( $\geq 25\%$ ) in the Uromol Study (Comprehensive Transcriptional Analysis of Early-Stage Urothelial Carcinoma. Cancer Cell. 2016 Jul 11;30(1):27-42. doi: 10.1016/j.ccell.2016.05.004.

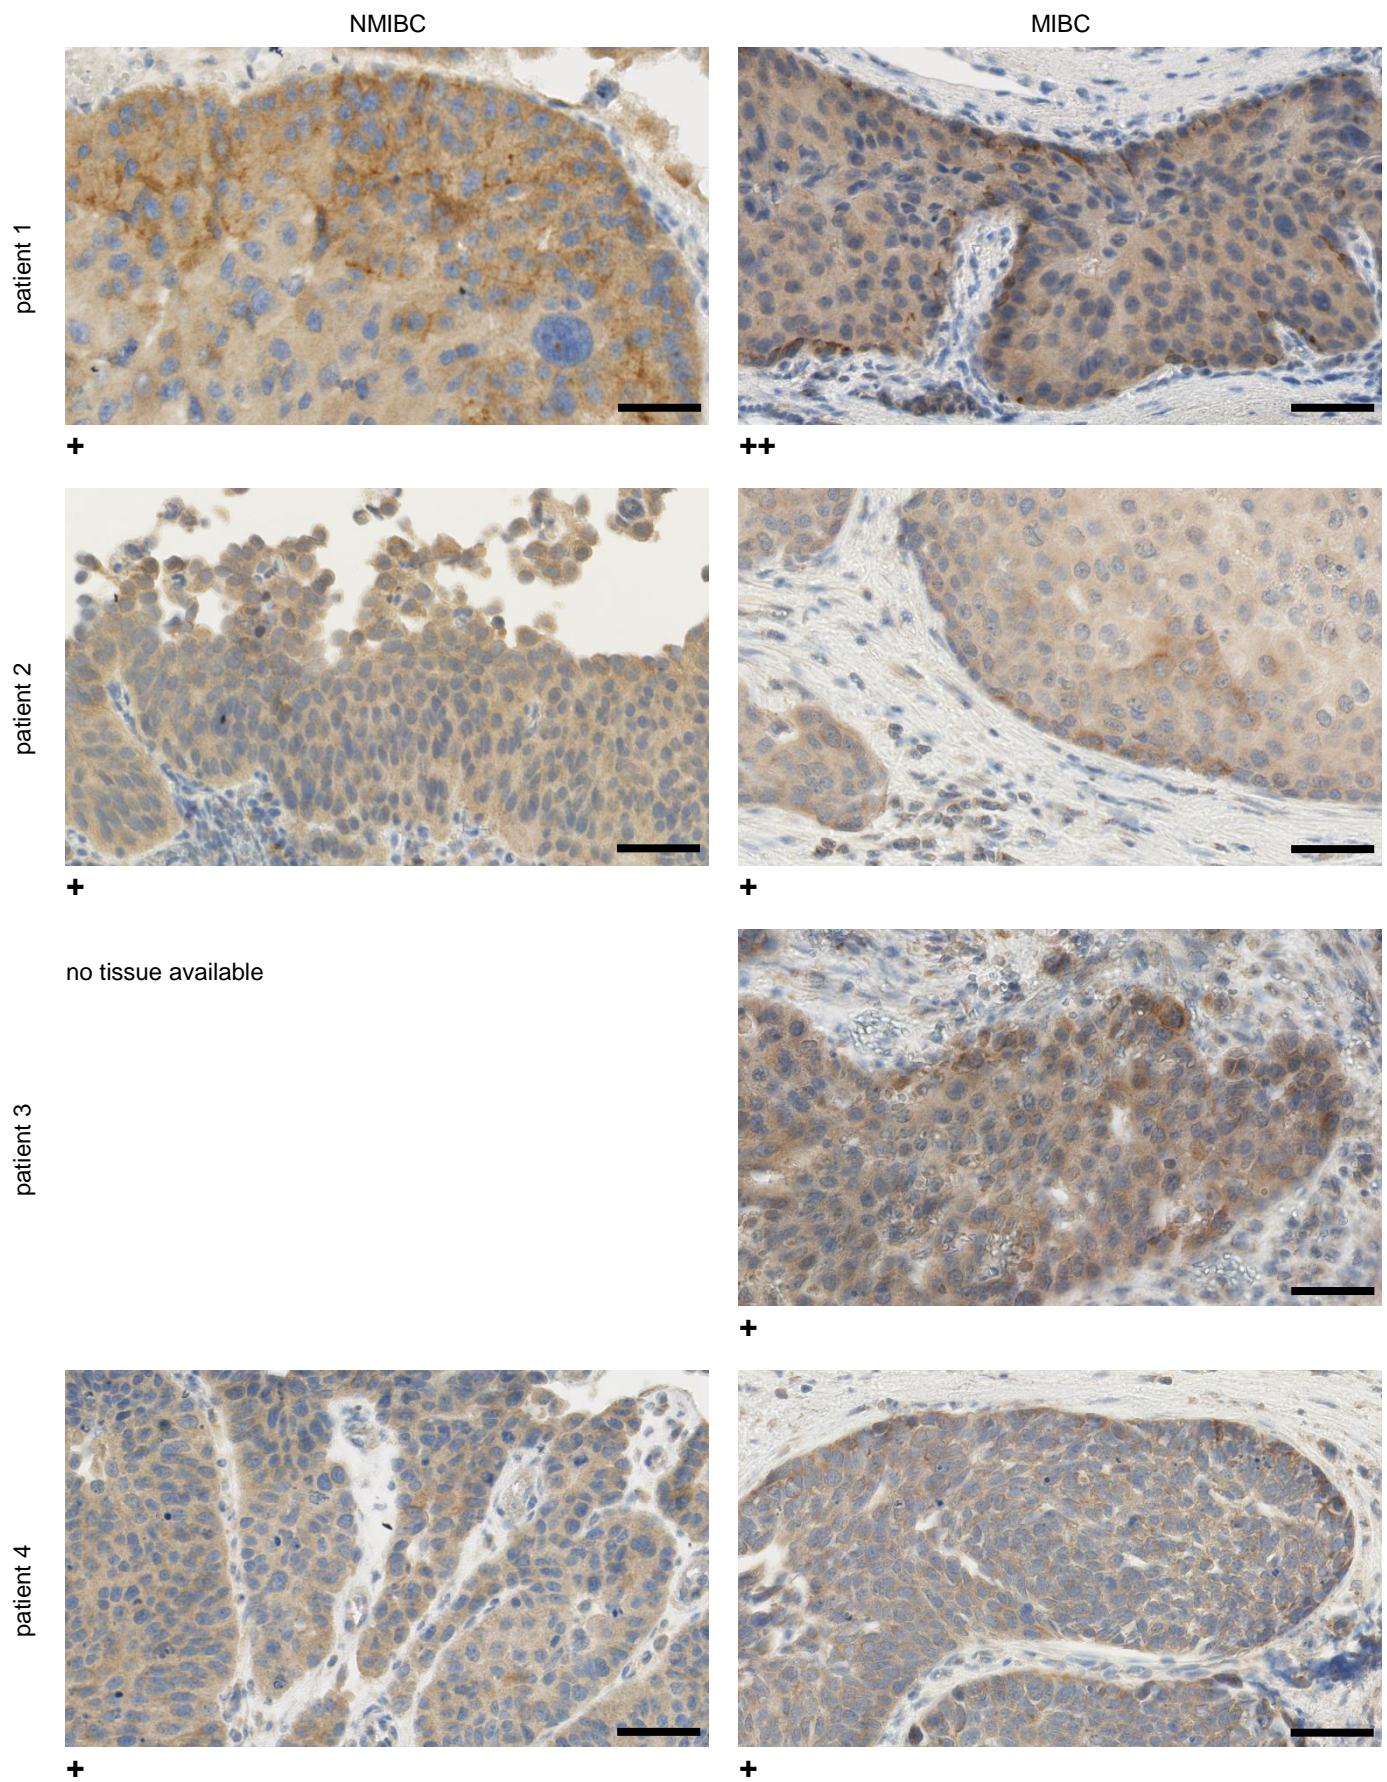

**Fig. S1** Continuing on next page

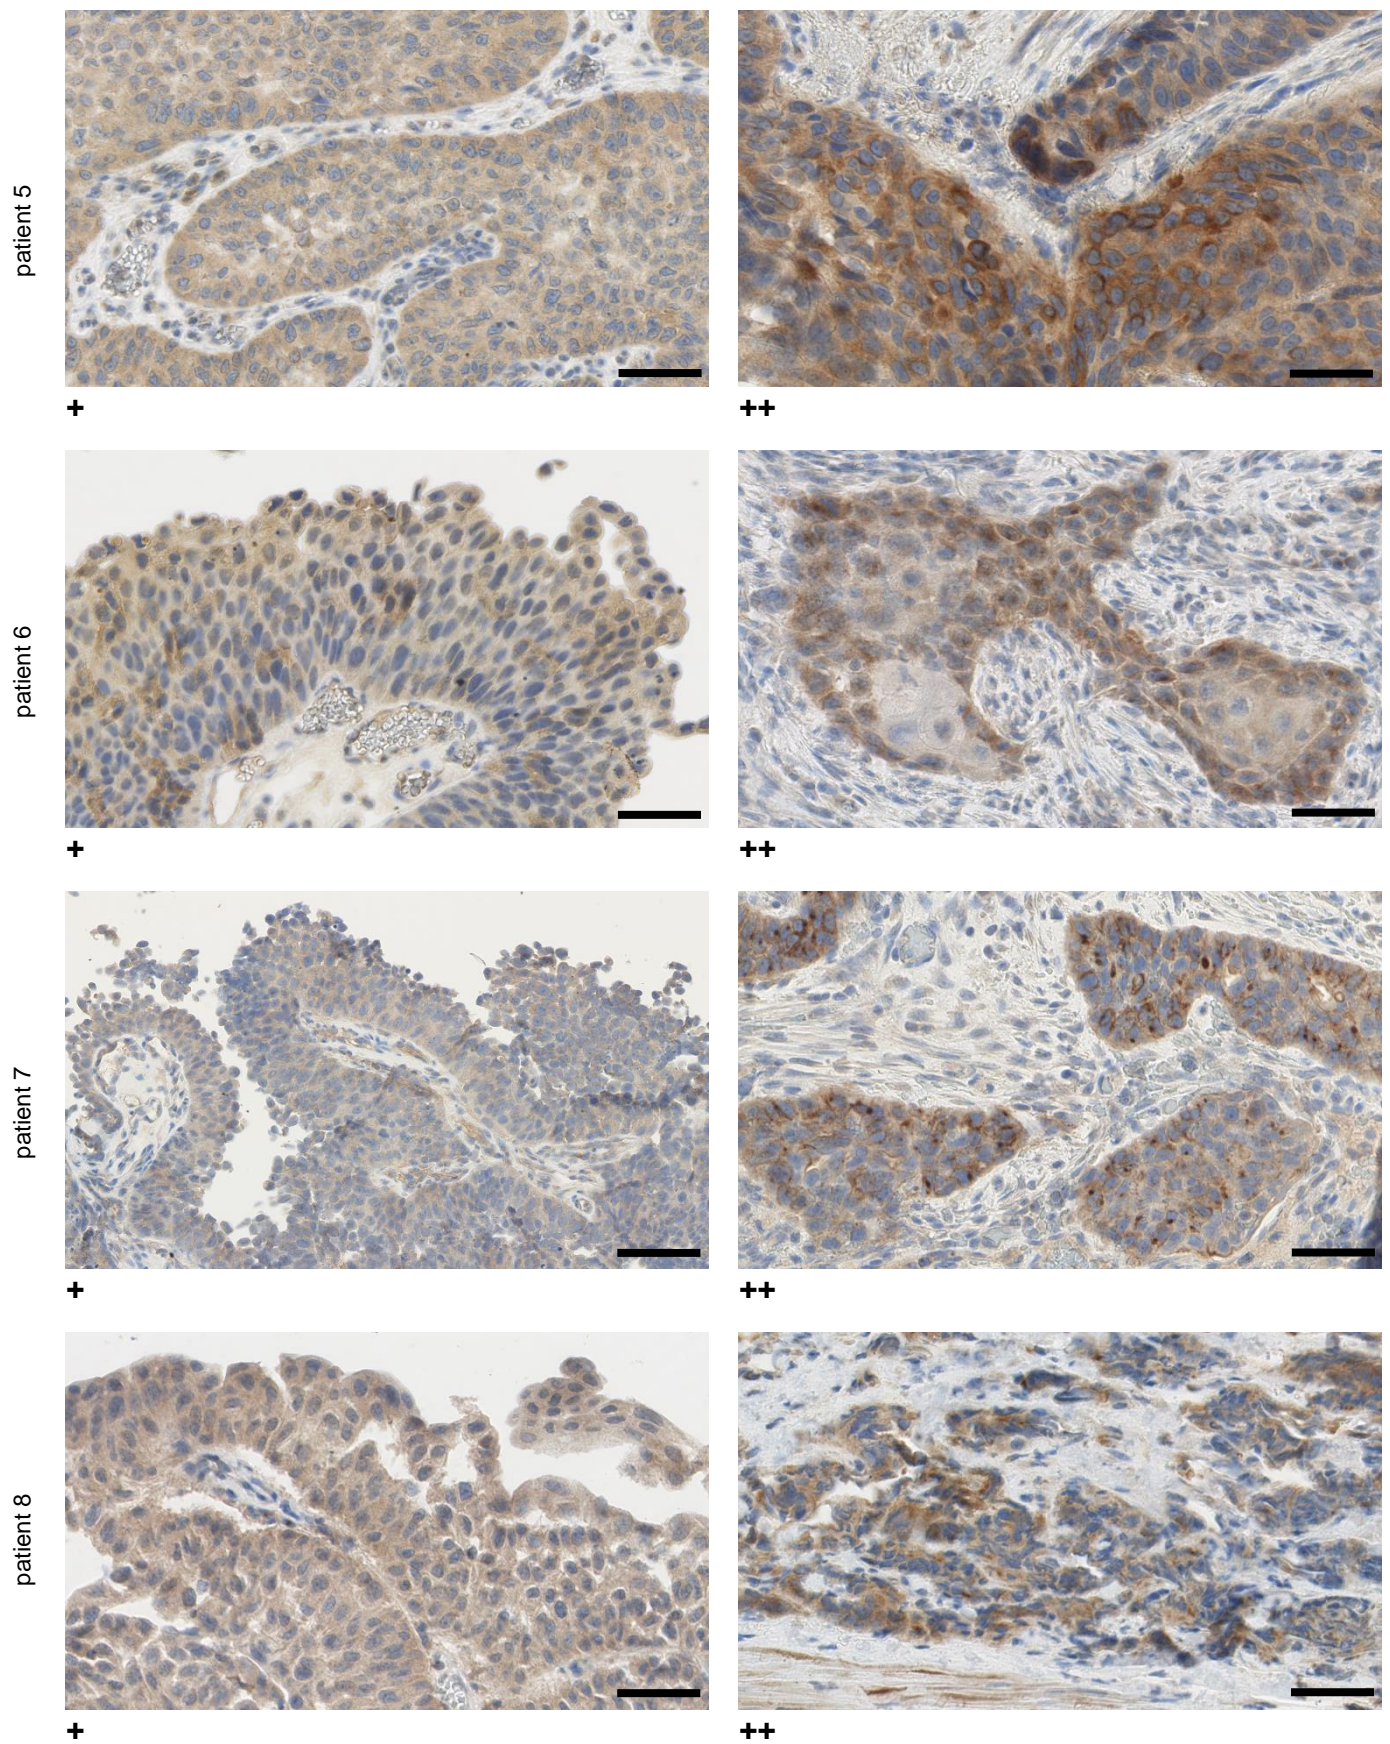

**Fig. S1** Immunohistochemical staining of SLC35F2 in NMIBC and metachronous MIBC. Scale bar = 50 μm. Overall average staining intensity of the tumor cells of the whole slide is specified as negative (-), weak (+), moderate (++) and strong (+++).

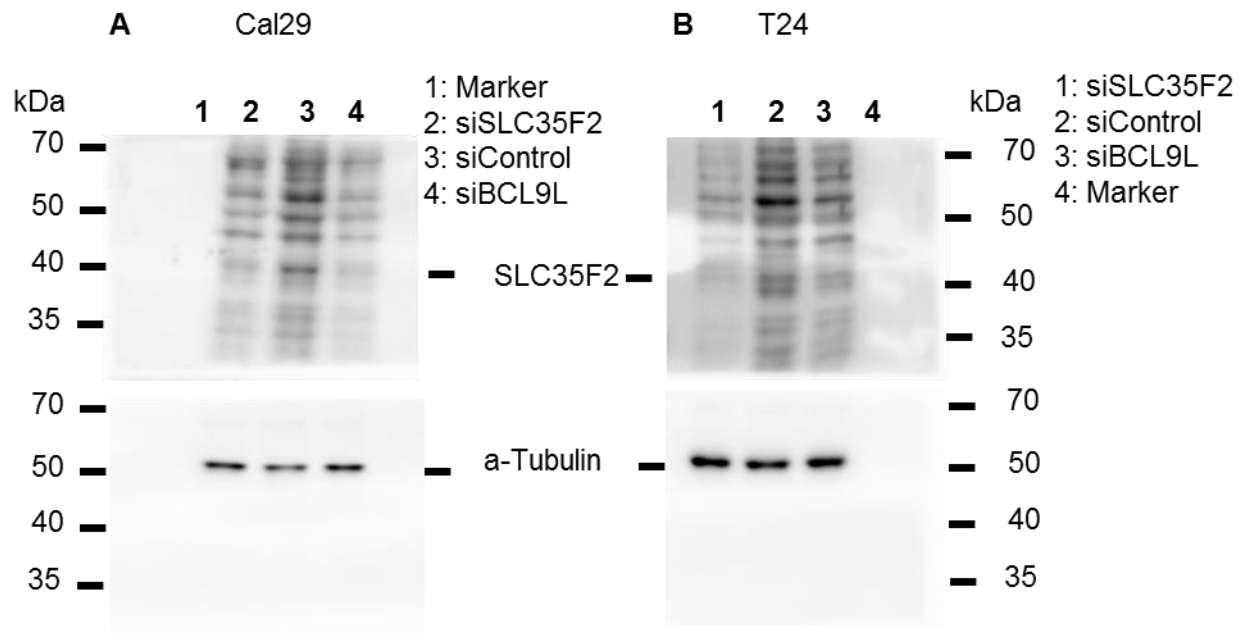

**Fig. S2**

Whole westernblot on PVDF membrane to estimate the protein expression of SLC35F2 after treatment of Cal29 (A) and T24 (B) cells with siSLC35F2 (Fig. A lane 2, Fig. B lane 1) or scramble siRNA (Fig. A lane 3, Fig. B lane 2) or another siRNA against BCL9L (Fig. A lane 4, Fig B lane 3). Membrane was first stained against SLC35F2 (upper) and secondly stained against a-Tubulin (lower).

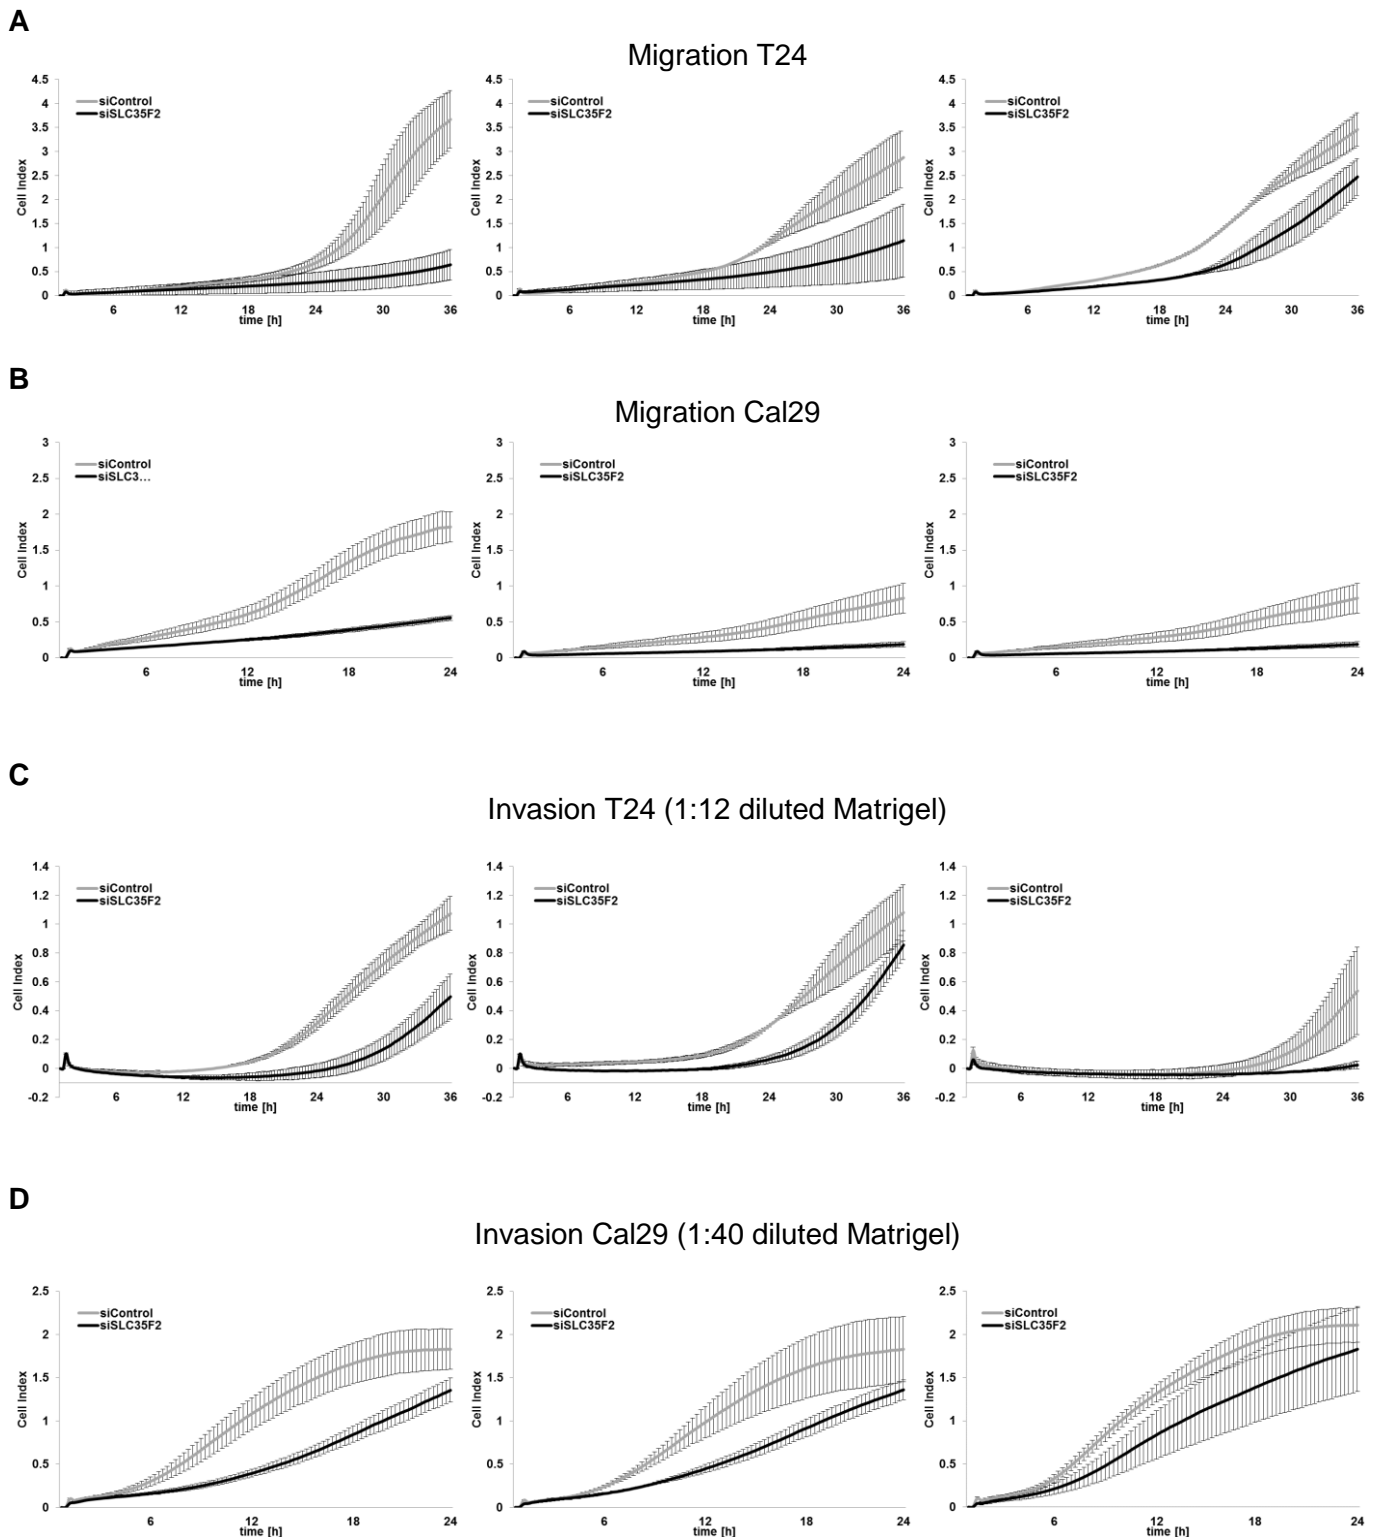

**Fig. S3 SLC35F5 dependent migration and invasion of bladder cancer cells**

Biological triplicates of xCelligence migration and invasion assay. Migration of Cal29 (A) and T24 (B) is reduced after siRNA knockdown of SLC35F2. Invasion was analyzed using 1:12 diluted matrigel for T24 (C) and using 1:40 diluted matrigel for Cal29. The invasiveness of T24 (C) and Cal29 (D) was significantly reduced after knockdown of SLC35F2. The cell index reflects the amount of cells that pass the membrane between upper and lower chamber.
